# Supplementary material for: A Vegetarian Diet Significantly Changes Plasma Kynurenine Concentrations
Source: MDPI journal article supplement (doi:10.3390/biom13020391), 2023-02-18
Supplement: s1 [file s1]

## Supplementary data on method for analysis of Picolinic acid (Pic)

### **Method based on article**

Middtun et al (2009), PMID 19337982.

### **Material**

Picolinic acid (purity >98%) was obtained from Sigma-Aldrich, St.Louis, MO 63178 USA.

2 Picolinic-d4 acid (purity >98%) was obtained from CDN isotopes. Ponte-Claire, Quebec, Canada.

### **Instrumentation**

Same as in PMID 19337982.

### **Chromatography and detection**

LC-MS/MS; positive-ion multiple reaction monitoring (MRM); retention time = 2.25 min.

Picolinic acid precursor ion = 124 m/z; product ion = 78 m/z.

Picolinic-d4 acid precursor ion = 128 m/z; product ion = 82 m/z.

### **Method performance**

Linear range: 8 - 400 nmol/L.

Linearity:  $r^2$ : 0.99.

LOD (S/N >5): 8 nmol/L.

Within-day CV: 6-7 %.

Between-day CV: 5-8 %.
